# Supplementary material for: New sarcosine–metal halide complexes related to ferroelectric TSCC
Source: Royal Society of Chemistry journal article supplement (doi:10.1039/c8ce00719e), 2018-01-01
Supplement: c8ce00719e1.pdf [file c8ce00719e1.pdf]

## New sarcosine-metal halide complexes related to the ferroelectric TSCC

Rebecca Clulow and Philip Lightfoot\*

School of Chemistry and EaStChem, University of St Andrews, St Andrews, Fife, KY16 9ST, UK

\*E-mail: pl@st-andrews.ac.uk

### Supplementary Material

#### Crystallographic data

**Table S1** Crystallographic data and refinement details collected at 173 K

| Parameter                     | TSCB                                                                            | TSSC                                                                            | TSSB                                                                            | TSMnl                                                                                             | TSMgB                                                                                              | BSCI                                                                                              | BSMgC                                                                                              | BSMnC                                                                                              | TSCI                                                                                              |
|-------------------------------|---------------------------------------------------------------------------------|---------------------------------------------------------------------------------|---------------------------------------------------------------------------------|---------------------------------------------------------------------------------------------------|----------------------------------------------------------------------------------------------------|---------------------------------------------------------------------------------------------------|----------------------------------------------------------------------------------------------------|----------------------------------------------------------------------------------------------------|---------------------------------------------------------------------------------------------------|
| Formula                       | (C <sub>3</sub> NO <sub>2</sub> H <sub>7</sub> ) <sub>3</sub> CaBr <sub>2</sub> | (C <sub>3</sub> NO <sub>2</sub> H <sub>7</sub> ) <sub>3</sub> SrCl <sub>2</sub> | (C <sub>3</sub> NO <sub>2</sub> H <sub>7</sub> ) <sub>3</sub> SrBr <sub>2</sub> | (C <sub>3</sub> NO <sub>2</sub> H <sub>7</sub> ) <sub>3</sub> MnI <sub>2</sub> ·2H <sub>2</sub> O | (C <sub>3</sub> NO <sub>2</sub> H <sub>7</sub> ) <sub>3</sub> MgBr <sub>2</sub> ·2H <sub>2</sub> O | (C <sub>3</sub> NO <sub>2</sub> H <sub>7</sub> ) <sub>2</sub> Cal <sub>2</sub> ·2H <sub>2</sub> O | (C <sub>3</sub> NO <sub>2</sub> H <sub>7</sub> ) <sub>2</sub> MgCl <sub>2</sub> ·2H <sub>2</sub> O | (C <sub>3</sub> NO <sub>2</sub> H <sub>7</sub> ) <sub>2</sub> MnCl <sub>2</sub> ·2H <sub>2</sub> O | (C <sub>3</sub> NO <sub>2</sub> H <sub>7</sub> ) <sub>4</sub> Cal <sub>2</sub> ·2H <sub>2</sub> O |
| Formula Weight                | 467.19                                                                          | 425.81                                                                          | 514.73                                                                          | 612.06                                                                                            | 487.45                                                                                             | 508.10                                                                                            | 309.43                                                                                             | 340.06                                                                                             | 686.29                                                                                            |
| Density (g cm <sup>-3</sup> ) | 1.832                                                                           | 1.747                                                                           | 2.022                                                                           | 2.093                                                                                             | 1.793                                                                                              | 2.066                                                                                             | 1.520                                                                                              | 1.630                                                                                              | 1.792                                                                                             |
| Crystal System                | Orthorhombic                                                                    | Monoclinic                                                                      | Orthorhombic                                                                    | Orthorhombic                                                                                      | Orthorhombic                                                                                       | Triclinic                                                                                         | Triclinic                                                                                          | Triclinic                                                                                          | Monoclinic                                                                                        |
| Space Group                   | Pnma                                                                            | P2 <sub>1</sub> /a                                                              | Pcab                                                                            | Pnma                                                                                              | Pnma                                                                                               | P-1                                                                                               | P-1                                                                                                | P-1                                                                                                | P2 <sub>1</sub> /n                                                                                |
| a/Å                           | 9.2414(6)                                                                       | 8.7535(6)                                                                       | 8.7723(6)                                                                       | 9.8288(7)                                                                                         | 9.5844(6)                                                                                          | 4.9952(4)                                                                                         | 4.7711(4)                                                                                          | 4.8078(4)                                                                                          | 11.2880(8)                                                                                        |
| b/Å                           | 17.6966(13)                                                                     | 10.3752(7)                                                                      | 10.5359(7)                                                                      | 19.2160(15)                                                                                       | 18.9445(13)                                                                                        | 5.9493(5)                                                                                         | 5.3186(4)                                                                                          | 5.3548(4)                                                                                          | 10.0620(7)                                                                                        |
| c/Å                           | 10.3565(7)                                                                      | 17.8337(13)                                                                     | 36.5820(3)                                                                      | 10.2845(8)                                                                                        | 9.9448(6)                                                                                          | 13.8126(12)                                                                                       | 13.5193(12)                                                                                        | 13.6620(12)                                                                                        | 23.0573(16)                                                                                       |
| α/°                           | 90                                                                              | 90                                                                              | 90                                                                              | 90                                                                                                | 90                                                                                                 | 95.593(13)                                                                                        | 84.365(12)                                                                                         | 83.825(12)                                                                                         | 90                                                                                                |
| β/°                           | 90                                                                              | 91.867(6)                                                                       | 90                                                                              | 90                                                                                                | 90                                                                                                 | 90.980(12)                                                                                        | 82.080(12)                                                                                         | 82.288(12)                                                                                         | 103.722(4)                                                                                        |
| γ/°                           | 90                                                                              | 90                                                                              | 90                                                                              | 90                                                                                                | 90                                                                                                 | 90.965(11)                                                                                        | 87.969(12)                                                                                         | 87.503(12)                                                                                         | 90                                                                                                |
| V/Å <sup>3</sup>              | 1693.7(2)                                                                       | 1618.8(2)                                                                       | 3381.1(3)                                                                       | 1942.4(3)                                                                                         | 1805.7(2)                                                                                          | 408.40(6)                                                                                         | 338.06(5)                                                                                          | 346.37(5)                                                                                          | 2544.1(3)                                                                                         |
| Z                             | 4                                                                               | 4                                                                               | 8                                                                               | 4                                                                                                 | 4                                                                                                  | 1                                                                                                 | 1                                                                                                  | 1                                                                                                  | 4                                                                                                 |
| Measured Ref                  | 15967                                                                           | 16382                                                                           | 21461                                                                           | 18998                                                                                             | 17644                                                                                              | 4214                                                                                              | 3423                                                                                               | 3548                                                                                               | 25445                                                                                             |
| Independent Ref               | 1969 [R(int) = 0.0500]                                                          | 3726 [R(int) = 0.0856]                                                          | 3873 [R(int) = 0.0518]                                                          | 2301 [R(int) = 0.0992]                                                                            | 2139 [R(int) = 0.0624]                                                                             | 1859 [R(int) = 0.0589]                                                                            | 1536 [R(int) = 0.0467]                                                                             | 1574 [R(int) = 0.0497]                                                                             | 5835 [R(int) = 0.0639]                                                                            |
| Refined Parameter             | 149                                                                             | 274                                                                             | 274                                                                             | 147                                                                                               | 166                                                                                                | 96                                                                                                | 96                                                                                                 | 115                                                                                                | 393                                                                                               |
| GOOF                          | 0.800                                                                           | 0.823                                                                           | 1.015                                                                           | 0.978                                                                                             | 0.794                                                                                              | 1.107                                                                                             | 1.639                                                                                              | 0.815                                                                                              | 0.878                                                                                             |
| Final R Indices (I > 2σ(I))   | R1 = 0.0274                                                                     | R1 = 0.0390                                                                     | R1 = 0.0307                                                                     | R1 = 0.0406                                                                                       | R1 = 0.0288                                                                                        | R1 = 0.0659                                                                                       | R1 = 0.0625                                                                                        | R1 = 0.0429                                                                                        | R1 = 0.0392                                                                                       |

**Table S2** Crystallographic data and refinement details of strontium doped TSCC and TSCB

| Parameter                     | TSCC 50% Sr                                                                                                       | TSCB 50% Sr                                                                                                       |
|-------------------------------|-------------------------------------------------------------------------------------------------------------------|-------------------------------------------------------------------------------------------------------------------|
| Formula                       | (C <sub>3</sub> NO <sub>2</sub> H <sub>7</sub> ) <sub>3</sub> Ca <sub>0.5</sub> Sr <sub>0.5</sub> Cl <sub>2</sub> | (C <sub>3</sub> NO <sub>2</sub> H <sub>7</sub> ) <sub>3</sub> Ca <sub>0.5</sub> Sr <sub>0.5</sub> Br <sub>2</sub> |
| Formula Weight                | 398.71                                                                                                            | 486.60                                                                                                            |
| Density (g cm <sup>-3</sup> ) | 1.620                                                                                                             | 1.895                                                                                                             |
| Crystal System                | Orthorhombic                                                                                                      | Orthorhombic                                                                                                      |
| Space Group                   | Pnma                                                                                                              | Pnma                                                                                                              |
| a/Å                           | 8.9965(7)                                                                                                         | 9.1728(7)                                                                                                         |
| b/Å                           | 17.6045(3)                                                                                                        | 17.8422(14)                                                                                                       |
| c/Å                           | 10.3191(15)                                                                                                       | 10.4200(8)                                                                                                        |
| α/°                           | 90                                                                                                                | 90                                                                                                                |
| β/°                           | 90                                                                                                                | 90                                                                                                                |
| γ/°                           | 90                                                                                                                | 90                                                                                                                |
| V/Å <sup>3</sup>              | 1634.3(3)                                                                                                         | 1705.4(2)                                                                                                         |

|                             |                        |                        |
|-----------------------------|------------------------|------------------------|
| Z                           | 4                      | 4                      |
| Measured Ref                | 15958                  | 16650                  |
| Independent Ref             | 1926 [R(int) = 0.0732] | 2020 [R(int) = 0.0841] |
| Refined Parameter           | 150                    | 150                    |
| GOOF                        | 1.079                  | 0.895                  |
| Final R Indices (I > 2σ(I)) | R1 = 0.0522            | R1 = 0.0384            |

**Table S3** Selected bond distances (Å) and bond valence sums derived from single crystal X-ray diffraction data collected at 173 K

| Bond  | TSCB       | TSSC     | TSSB      | TSMnI    | TSMgB      | BSCl      | BSMgC    | BSMnC    | TSCI     |          |
|-------|------------|----------|-----------|----------|------------|-----------|----------|----------|----------|----------|
| M - O | 2.2935(15) | 2.431(3) | 2.438(3)  | 2.155(6) | 2.019(3)   | 2.335(6)  | 2.066(4) | 2.150(2) | 2.292(3) | 2.304(3) |
|       | 2.2936(15) | 2.500(3) | 2.518(36) | 2.192(6) | 2.082(2)   | 2.335(6)  | 2.066(4) | 2.150(2) | 2.292(3) | 2.304(3) |
|       | 2.305(2)   | 2.537(3) | 2.521(3)  | 2.200(4) | 2.082(2)   | 2.338(7)  | 2.073(4) | 2.173(3) | 2.323(3) | 2.328(3) |
|       | 2.3671(19) | 2.568(3) | 2.572(2)  | 2.200(4) | 2.096(2)   | 2.338(7)  | 2.073(4) | 2.173(3) | 2.323(3) | 2.328(3) |
|       | 2.3816(14) | 2.583(3) | 2.595(3)  | 2.208(4) | 2.096(2)   | 2.394(10) | 2.102(4) | 2.202(2) | 2.392(3) | 2.399(3) |
|       | 2.3816(14) | 2.721(3) | 2.660(3)  | 2.208(4) | 2.102(3)   | 2.394(10) | 2.102(4) | 2.202(2) | 2.392(3) | 2.399(3) |
|       |            | 2.796(3) | 2.888(3)  |          |            |           |          |          |          |          |
| N-H-X | 3.2864(12) | 3.163(4) | 3.288(3)  | 3.503(4) | 3.3203(17) | 3.483(8)  | 3.124(4) | 3.146(3) | 3.561(4) |          |
|       | 3.3188(17) | 3.210(4) | 3.355(3)  | 3.549(5) | 3.422(3)   | 3.462(9)  | 3.079(5) | 3.098(3) | 3.612(4) |          |
|       | 3.3287(18) | 3.173(4) | 3.293(3)  | 3.692(5) | 3.483(3)   |           |          |          | 3.577(5) |          |
|       |            | 3.234(4) | 3.374(3)  |          |            |           |          |          | 3.487(5) |          |
|       |            | 3.226(4) | 3.320(3)  |          |            |           |          |          |          |          |
|       |            | 3.251(4) | 3.311(3)  |          |            |           |          |          |          |          |
| BVS   | 2.22       | 2.04     | 2.01      | 2.02     | 2.12       | 2.10      | 2.11     | 2.12     | 2.23     | 2.18     |

**Table S4** Selected bond distances (Å) of strontium doped TSCC and TSCB

| Bond  | TSCC 50% Sr | TSCB 50% Sr |
|-------|-------------|-------------|
| M - O | 2.341(3)    | 2.324(4)    |
|       | 2.341(3)    | 2.324(4)    |
|       | 2.346(4)    | 2.344(5)    |
|       | 2.430(4)    | 2.428(5)    |
|       | 2.448(3)    | 2.444(4)    |
|       | 2.448(3)    | 2.444(4)    |
| N-H-X | 3.206(2)    | 3.306(3)    |
|       | 3.233(3)    | 3.334(5)    |
|       | 3.224(3)    | 3.345(5)    |

**Figure S1** Differential Scanning Calorimetry data of TSCB ( $(\text{C}_3\text{NO}_2\text{H}_7)_3\text{CaBr}_2$ ), TSSC ( $(\text{C}_3\text{NO}_2\text{H}_7)_3\text{SrCl}_2$ ), TSSB ( $(\text{C}_3\text{NO}_2\text{H}_7)_3\text{SrBr}_2$ ), TSMnl ( $(\text{C}_3\text{NO}_2\text{H}_7)_3\text{MnI}_2 \cdot 2\text{H}_2\text{O}$ ), TSMgB ( $(\text{C}_3\text{NO}_2\text{H}_7)_3\text{MgBr}_2 \cdot 2\text{H}_2\text{O}$ ), BSCI ( $(\text{C}_3\text{NO}_2\text{H}_7)_2\text{CaI}_2 \cdot 2\text{H}_2\text{O}$ ), BSMgC ( $(\text{C}_3\text{NO}_2\text{H}_7)_2\text{MgCl}_2 \cdot 2\text{H}_2\text{O}$ ), BSMnC ( $(\text{C}_3\text{NO}_2\text{H}_7)_2\text{MnCl}_2 \cdot 2\text{H}_2\text{O}$ ), TSCI ( $(\text{C}_3\text{NO}_2\text{H}_7)_4\text{CaI}_2 \cdot 2\text{H}_2\text{O}$ ), TSCC 10% Sr ( $(\text{C}_3\text{NO}_2\text{H}_7)_3\text{Ca}_{0.9}\text{Sr}_{0.1}\text{Cl}_2$ ), TSCC 20% Sr ( $(\text{C}_3\text{NO}_2\text{H}_7)_3\text{Ca}_{0.8}\text{Sr}_{0.2}\text{Cl}_2$ ) and TSCC 30% Sr ( $(\text{C}_3\text{NO}_2\text{H}_7)_3\text{Ca}_{0.7}\text{Sr}_{0.3}\text{Cl}_2$ ).

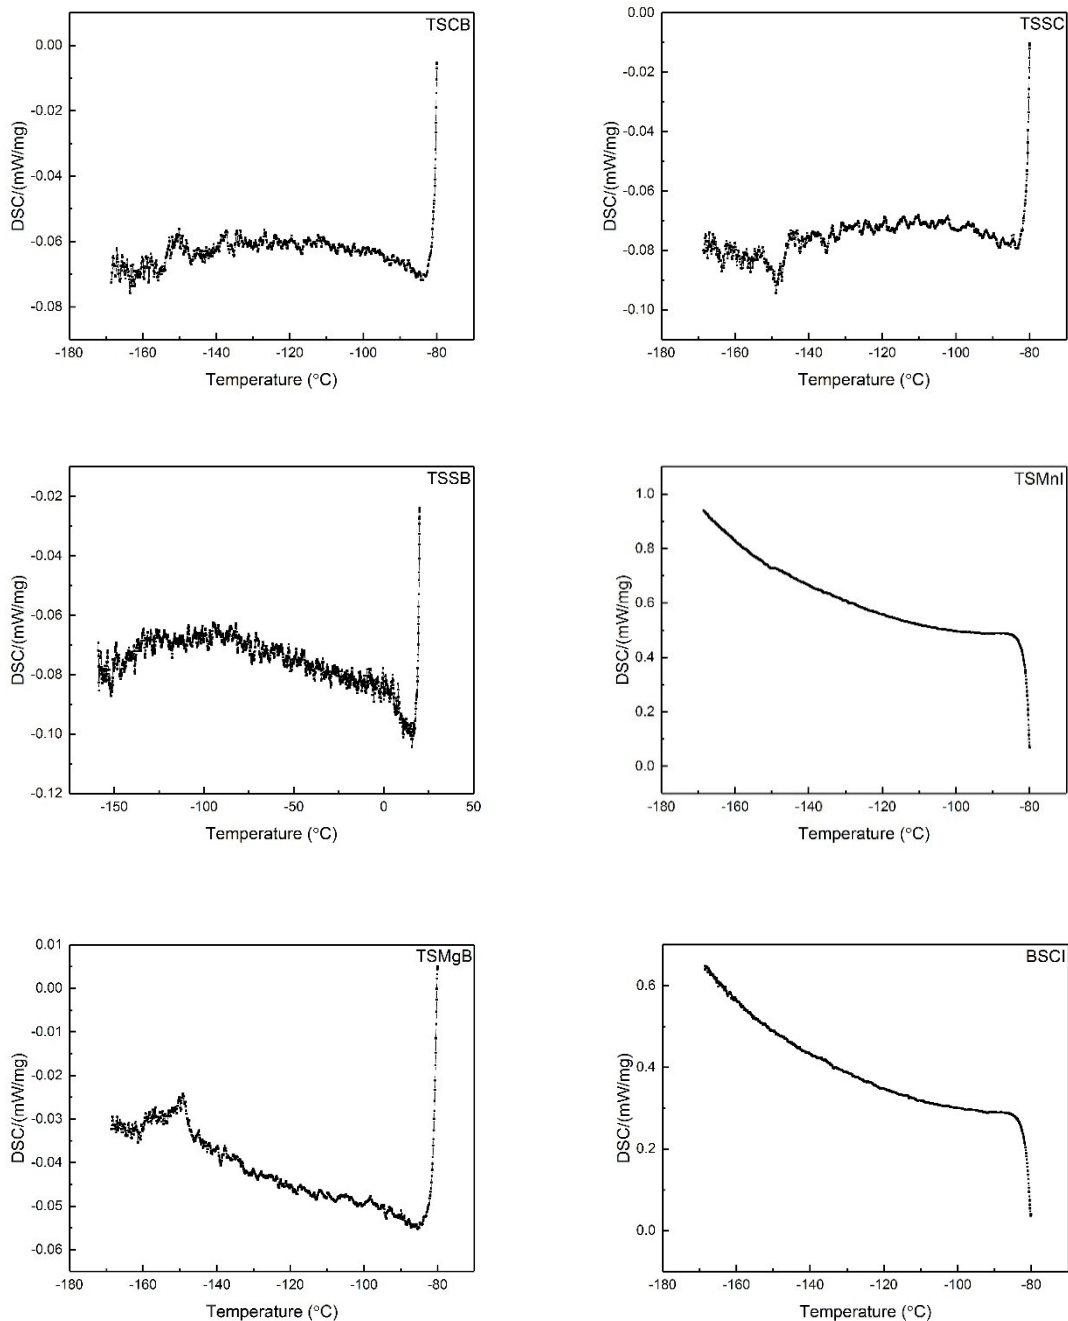

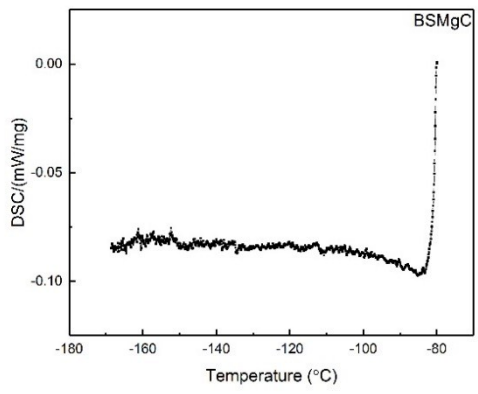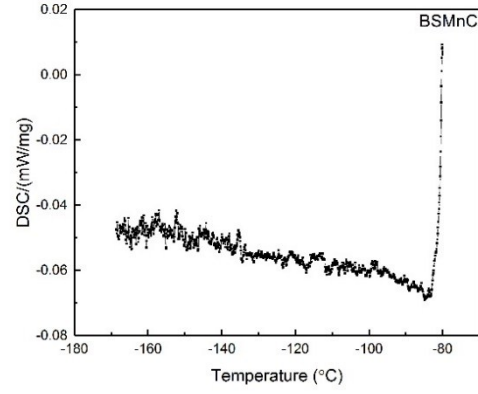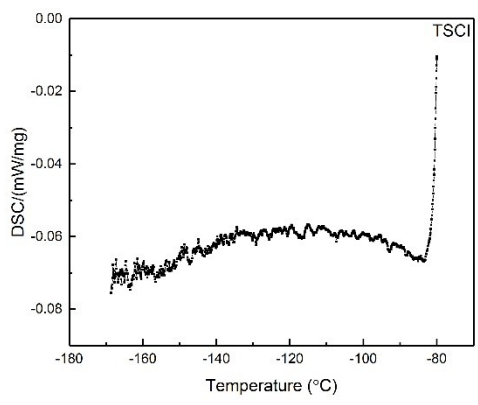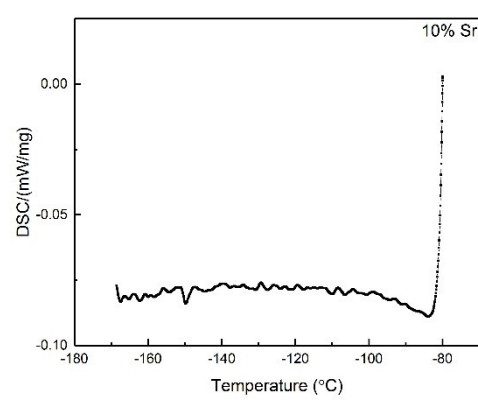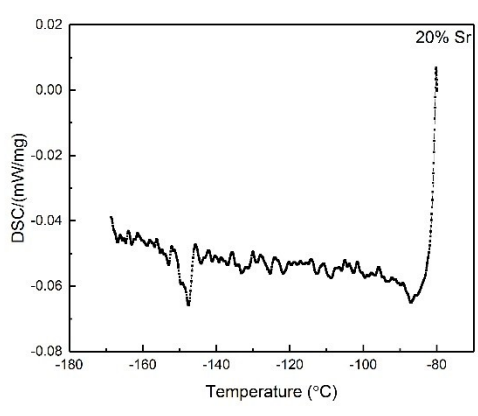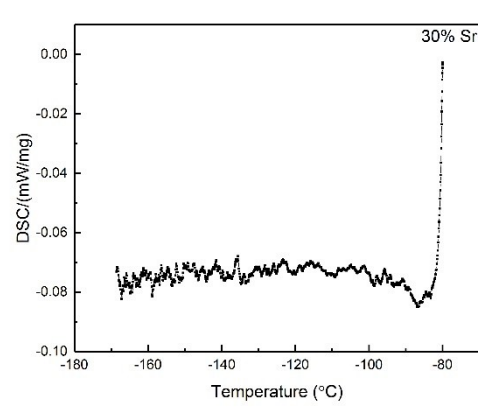

**Figure S2** Thermal Gravimetric Analysis data of BSCl ( $(C_3NO_2H_7)_2CaI_2 \cdot 2H_2O$ ), BSMnC ( $(C_3NO_2H_7)_2MnCl_2 \cdot 2H_2O$ ) and TSMnI ( $(C_3NO_2H_7)_3MnI_2 \cdot 2H_2O$ ) showing observed and theoretical weight loss corresponding to dehydration

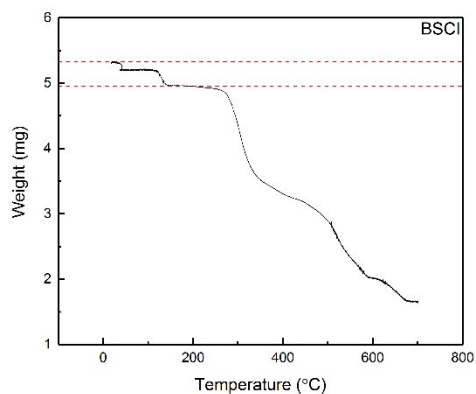

% weight loss = 6.99 %  
Theoretical weight loss = 7.09 %

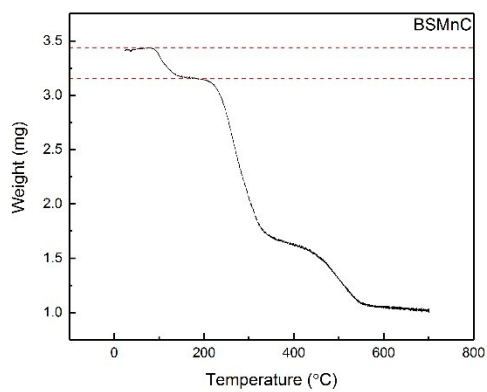

% weight loss = 8.15 %  
Theoretical weight loss = 10.59 %

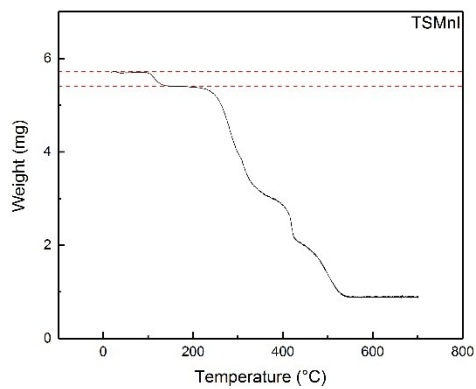

% weight loss = 5.59 %  
Theoretical weight loss = 5.89 %
